# Supplementary material for: Improvement of quality of life through glycemic control by liraglutide, a GLP-1 analog, in insulin-naive patients with type 2 diabetes mellitus: the PAGE1 study
Source: Springer Nature journal article supplement (doi:10.1186/s13098-016-0202-0), 2017-01-07

**Additional file 2.**

**Caption:** Figure showing hypoglycemic events before and after liraglutide treatment

**Title:**

Improvement of quality of life through glycemic control by liraglutide, a GLP-1 analog, in insulin-naive patients with type 2 diabetes mellitus: the PAGE1 study

Hitoshi Ishii1, Tetsuji Niiya2, Yasuhiro Ono3, Naoyuki Inaba4, Hideaki Jinnouchi5, Hirotaka Watada6

1 Department of Diabetology, Nara Medical University, Kashihara, Japan

2 Department of Internal Medicine, Matsuyama Shimin Hospital, Matsuyama, Ehime, Japan

3 Department of Medicine, Takagi Hospital, Okawa, Fukuoka, Japan

4 Department of Metabolism & Endocrinology, Shizuoka Saiseikai General Hospital, Shizuoka, Japan

5 Diabetes Care Center, Jinnouchi Hospital, Kumamoto, Japan

6 Department of Metabolism & Endocrinology, Juntendo University Graduate School of Medicine, Tokyo, Japan

**Corresponding author:** Hitoshi Ishii, Department of Diabetology, Nara Medical University, 840 Shijo-cho, Kashihara City, Nara, 634-8552, Japan.

Tel: +81-744-22-3051; Fax: +81-744-29-8811; E-mail: hit3910@gmail.com

**Figure S1. Effects of liraglutide on hypoglycemic events. (A)** The proportion of patientsexperiencinghypoglycemic events during the 4 weeks prior to baseline and week 12 after the initiation of liraglutide treatment. **(B)** The numberof hypoglycemic events during the 4 weeks prior to baseline and week 12 after the initiation of liraglutide treatment. Data in (B) are represented as the means ± SD


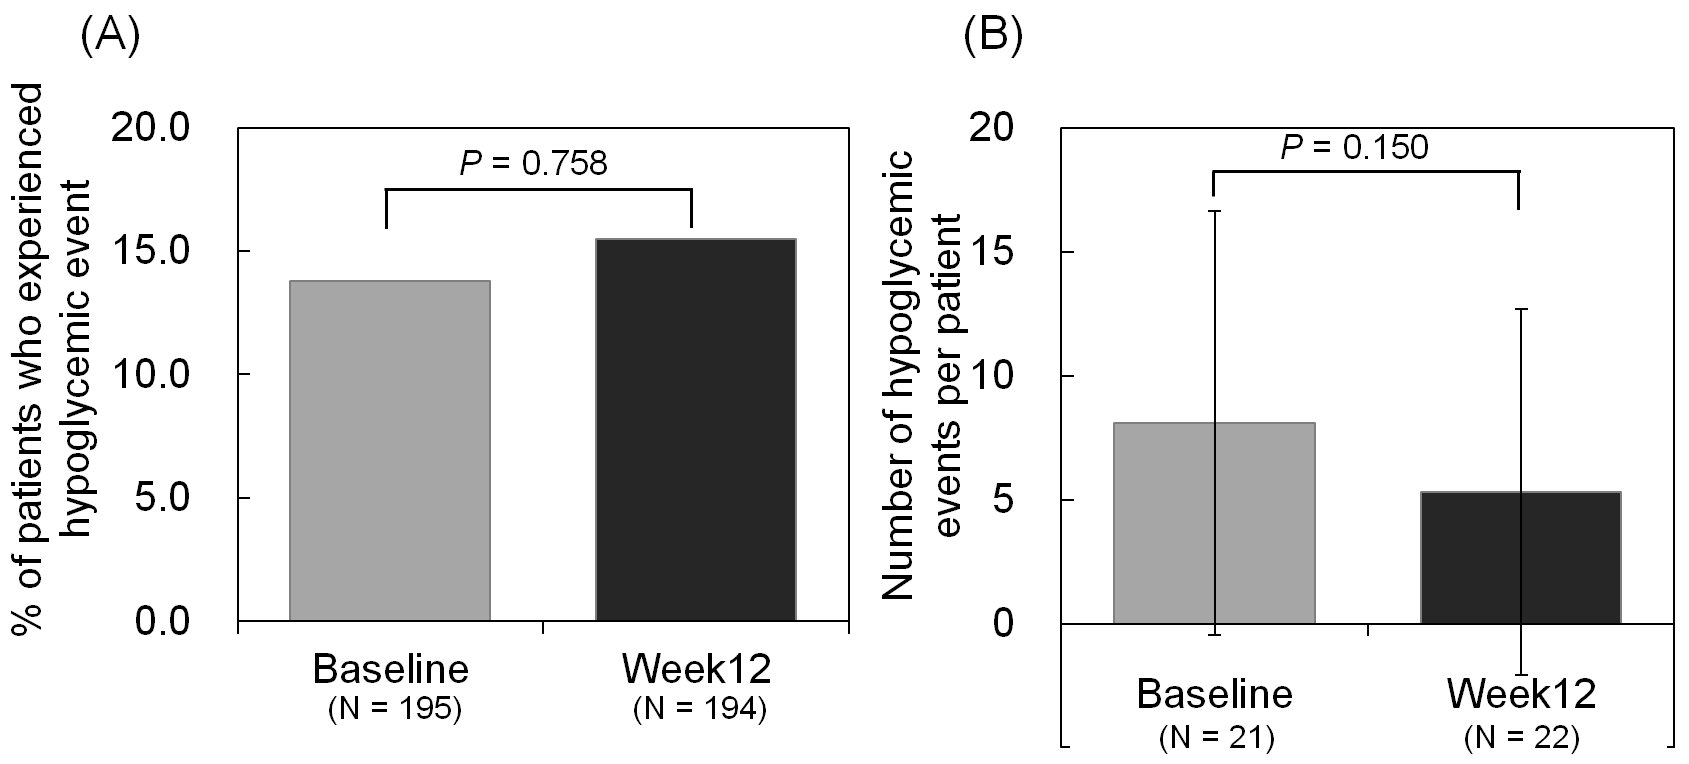

Supplement: MOESM2 [file 11985174]
